# Supplementary material for: Sulfur vacancies and a Ni2P co-catalyst synergistically boost the photocatalytic H2 evolution of Zn0.5Cd0.5S
Source: Royal Society of Chemistry journal article supplement (doi:10.1039/d3gc04940j), 2024-01-01
Supplement: d3gc04940j1.pdf [file d3gc04940j1.pdf]

## **Sulfur vacancies and Ni<sub>2</sub>P co-catalyst synergistically boosting**

### **Zn<sub>0.5</sub>Cd<sub>0.5</sub>S photocatalytic H<sub>2</sub> evolution**

Lindong Xia<sup>#</sup>, Wenzhen Qin<sup>#</sup>, Yu Xie<sup>\*</sup>, Yiqiao Wang, Yun Ling

College of Environment and Chemical Engineering, Nanchang Hangkong University,

Nanchang, 330063, China

Corresponding authors: Yu Xie

Email addresses: [xieyu\\_121@163.com](mailto:xieyu_121@163.com) (Y. Xie)

Tel.: +86(791) 83953408, Fax: +86(791) 83953373

<sup>#</sup> These authors contributed equally to this work

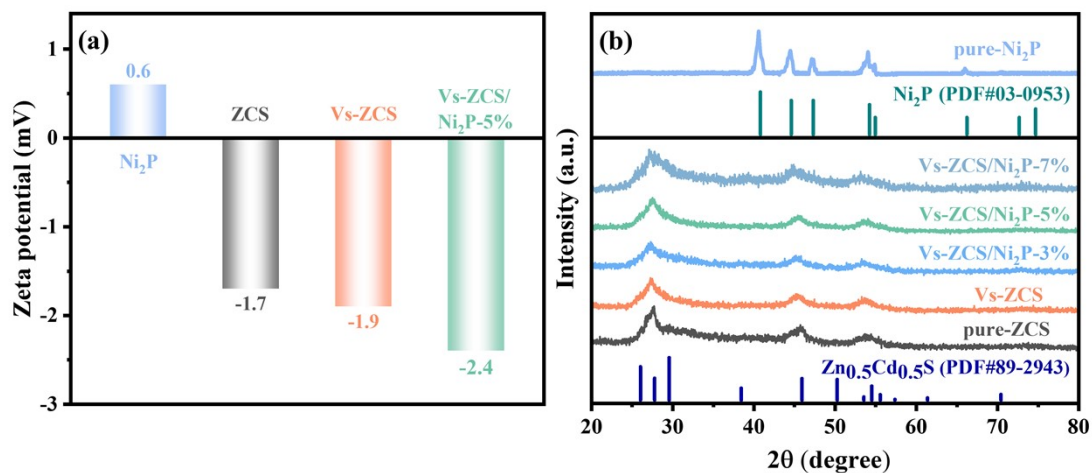

**Fig. S1** (a) Zeta potentials of Ni<sub>2</sub>P, ZCS, Vs-ZCS, Vs-ZCS/Ni<sub>2</sub>P-5%; (b) XRD pattern of ZCS, Vs-ZCS, Vs-ZCS/Ni<sub>2</sub>P-x%

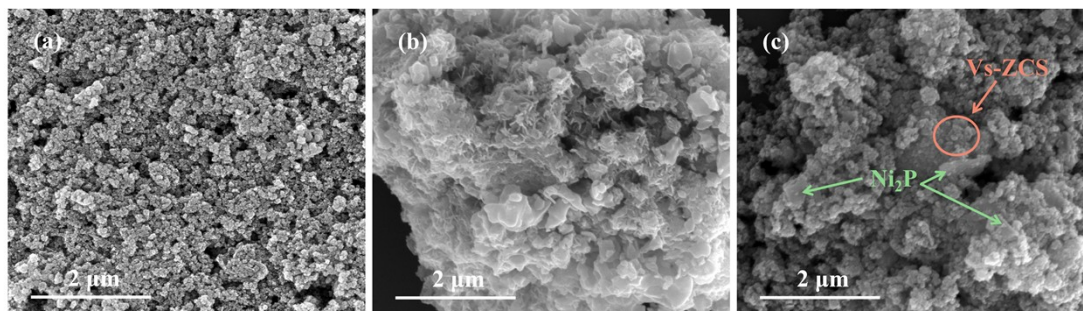

**Fig. S2** SEM images of Vs-ZCS (a), Ni<sub>2</sub>P (b), Vs-ZCS/Ni<sub>2</sub>P-5% (c)

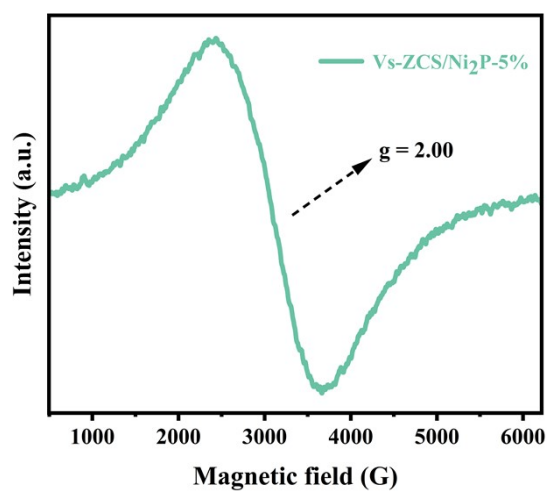

**Fig. S3** EPR spectra of Vs-ZCS/Ni<sub>2</sub>P-5%

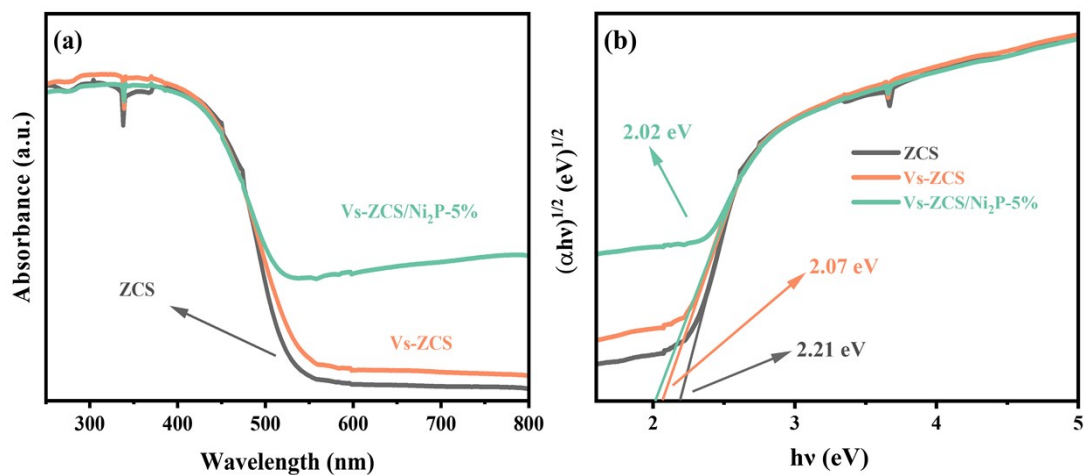

**Fig. S4** UV-vis DRS spectra (a) and band gap spectra (b) of ZCS, Vs-ZCS and Vs-ZCS/Ni<sub>2</sub>P-5%

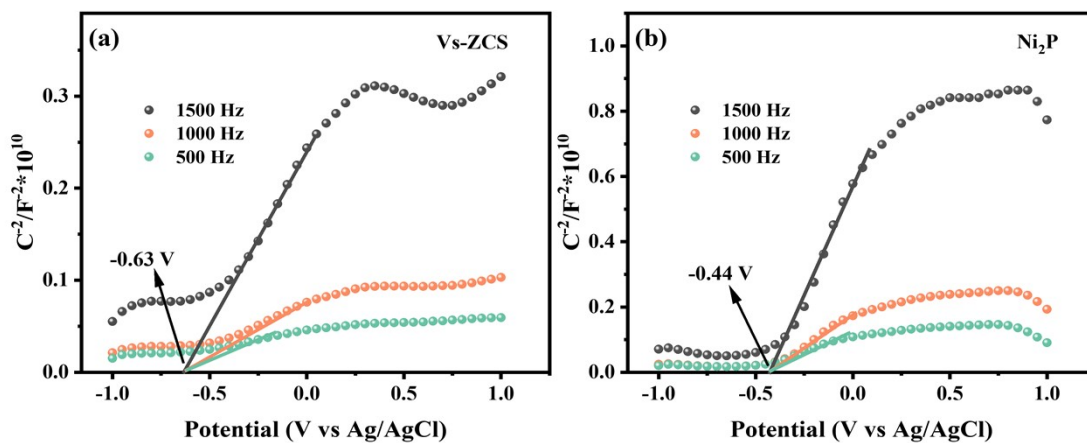

**Fig. S5** Mott-Schottky plots of Vs-ZCS (a) and Ni<sub>2</sub>P(b)

**Table S1** Surface area and pore volume of Vs-ZCS, Ni<sub>2</sub>P, and Vs-ZCS/Ni<sub>2</sub>P-5%

| Samples                     | S <sub>BET</sub> (m <sup>2</sup> /g) | Pore volume (cm <sup>3</sup> /g) |
|-----------------------------|--------------------------------------|----------------------------------|
| Vs-ZCS                      | 30.1790                              | 0.184686                         |
| Ni <sub>2</sub> P           | 67.5146                              | 0.275776                         |
| Vs-ZCS/Ni <sub>2</sub> P-5% | 45.6236                              | 0.267017                         |

**Table S2** Comparison of Vs-ZCS/Ni<sub>2</sub>P-5% photocatalytic hydrogen production performance with other photocatalytic materials

| Photocatalysts                                                        | Light Source<br>Scavenger                                                           | Performance<br>(mmol·h <sup>-1</sup> ·g <sup>-1</sup> ) | Reference        |
|-----------------------------------------------------------------------|-------------------------------------------------------------------------------------|---------------------------------------------------------|------------------|
| Co <sub>9</sub> S <sub>8</sub> /Zn <sub>0.5</sub> Cd <sub>0.5</sub> S | 300 W Xe lamp (λ>400 nm)<br>Na <sub>2</sub> S/Na <sub>2</sub> SO <sub>3</sub>       | 10.90                                                   | S1               |
| PtPd/Zn <sub>0.5</sub> Cd <sub>0.5</sub> S                            | 300 W Xe lamp (λ>400 nm)<br>Na <sub>2</sub> S/Na <sub>2</sub> SO <sub>3</sub>       | 9.69                                                    | S2               |
| Ni(OH) <sub>2</sub> /Zn <sub>0.5</sub> Cd <sub>0.5</sub> S            | 300 W Xe lamp (λ>400 nm)<br>Na <sub>2</sub> S/Na <sub>2</sub> SO <sub>3</sub>       | 6.87                                                    | S3               |
| Cu <sub>3</sub> P/Zn <sub>0.5</sub> Cd <sub>0.5</sub> S               | 300 W Xe lamp (λ>420 nm)<br>Na <sub>2</sub> S/Na <sub>2</sub> SO <sub>3</sub>       | 2.70                                                    | S4               |
| Ni/Zn <sub>0.5</sub> Cd <sub>0.5</sub> S                              | 300 W Xe lamp (λ>420 nm)<br>Na <sub>2</sub> S/Na <sub>2</sub> SO <sub>3</sub>       | 5.93                                                    | S5               |
| Ni <sub>2</sub> P/Zn <sub>0.9</sub> Cd <sub>0.1</sub> S               | 300 W Xe lamp (λ>400 nm)<br>Na <sub>2</sub> S/Na <sub>2</sub> SO <sub>3</sub>       | 1.88                                                    | S6               |
| Ni <sub>2</sub> P/Zn <sub>x</sub> Cd <sub>1-x</sub> Se                | 300 W Xe lamp (λ>420 nm)<br>Na <sub>2</sub> S/Na <sub>2</sub> SO <sub>3</sub>       | 4.34                                                    | S7               |
| Fe-Ni <sub>2</sub> P/ZnIn <sub>2</sub> S <sub>4</sub> -Vs             | 300 W Xe lamp (λ>420 nm)<br>TEOA                                                    | 4.55                                                    | S8               |
| <b>Vs-ZCS/Ni<sub>2</sub>P-5%</b>                                      | <b>300 W Xe lamp (λ&gt;380 nm)<br/>Na<sub>2</sub>S/Na<sub>2</sub>SO<sub>3</sub></b> | <b>40.81</b>                                            | <b>This work</b> |

**Table S3** The AQY of all samples at 380 nm

| Samples | ZCS                             | Vs-ZCS                          | Vs-ZCS/<br>Ni <sub>2</sub> P-3% | Vs-ZCS/<br>Ni <sub>2</sub> P-4% |
|---------|---------------------------------|---------------------------------|---------------------------------|---------------------------------|
| AQY (%) | 2.74                            | 7.01                            | 15.18                           | 16.83                           |
| Samples | Vs-ZCS/<br>Ni <sub>2</sub> P-5% | Vs-ZCS/<br>Ni <sub>2</sub> P-6% | Vs-ZCS/<br>Ni <sub>2</sub> P-7% | ZCS/<br>Ni <sub>2</sub> P-5%    |
| AQY (%) | 21.60                           | 18.96                           | 16.20                           | 5.76                            |

## References

- S1. X. L. Li, R. B. He, Y. J. Dai, S. S. Li, N. Xiao, A. X. Wang, Y. Q. Gao, N. Li, J. F. Gao, L. H. Zhang and L. Ge, *Chem. Eng. J.*, 2020, **400**, 125474.
- S2. L. H. Zhang, F. D. Zhang, H. Q. Xue, J. F. Gao, Y. Peng, W. Y. Song and L. Ge, *Chin. J. Catal.*, 2021, **42**, 1677-1688.
- S3. X. Y. Gao, D. Q. Zeng, J. R. Yang, W. J. Ong, T. Fujita, X. L. He, J. Q. Liu and Y. Z. Wei, *Chin. J. Catal.*, 2021, **42**, 1137-1146.
- S4. G. Y. Ge, S. T. Yuan, Q. Z. Liu, D. F. Yang, J. S. Shi, X. F. Lan and K. F. Xiao, *Appl. Surf. Sci.*, 2022, **597**, 153660.
- S5. X. Y. Gao, J. R. Yang, D. Q. Zeng, G. He, C. Dai, Y. N. Bao and Y. Z. Wei, *J. Alloys Compd.*, 2021, **871**, 159460.
- S6. Z. W. Shao, X. Meng, H. Lai, D. F. Zhang, X. P. Pu, C. H. Su, H. Li, X. Z. Ren and Y. L. Geng, *Chin. J. Catal.*, 2021, **42**, 439-449.
- S7. L. Wei, D. Q. Zeng, J. Q. Liu, H. F. Zheng, T. Fujita, M. Y. Liao, C. Y. Li and Y. Z. Wei, *J. Colloid Interface Sci.*, 2022, **608**, 3087-3097.

S8. G. Q. Li, H. O. Liang, X. Y. Fan, X. L. Lv, X. W. Sun, H. G. Wang and J. Bai, *J.*

*Mater. Chem. A.*, 2023, **11**, 14809-14818.
